# Supplementary material for: Impact of Baseline Neuropathy Severity on Vutrisiran Treatment Response in the Phase 3 HELIOS-A Study
Source: Springer Nature journal article supplement (doi:10.1007/s40120-024-00595-9), 2024-03-21
Supplement: MOESM1 [file 26888646]

## **SUPPLEMENTARY MATERIAL**

### **Impact of Baseline Neuropathy Severity on Vutrisiran Treatment Response in the Phase 3 HELIOS-A Study**

Marco Luigetti · Dianna Quan · John L. Berk · Isabel Conceição · Yohei Misumi · Chi-Chao Chao ·  
Shaun Bender · Emre Aldinc · John Vest · David Adams

Corresponding author: M. Luigetti

Dipartimento di Neuroscienze, Organi di Senso e Torace, Fondazione Policlinico Universitario  
Agostino Gemelli IRCCS, Rome, Italy; Dipartimento di Neuroscienze, Università Cattolica del Sacro  
Cuore, Rome, Italy

Email: [mluigetti@gmail.com](mailto:mluigetti@gmail.com)

D. Quan

Department of Neurology, University of Colorado Anschutz, Aurora, CO, USA

J. L. Berk

Boston Medical Center, Boston, MA, USA

I. Conceição

Department of Neurology, CHULN, Hospital Santa Maria and Faculdade de Medicina, Universidade  
de Lisboa, Lisbon, Portugal

Y. Misumi

Department of Neurology, Graduate School of Medical Sciences, Kumamoto University, Kumamoto,  
Japan

C-C. Chao

Department of Neurology, National Taiwan University Hospital, Taipei, Taiwan

S. Bender · E. Aldinc · J. Vest

Alnylam Pharmaceuticals, Cambridge, MA, USA

D. Adams

Neurology Department, CHU Bicêtre, AP-HP, Université Paris-Saclay, INSERM U-1195 Le Kremlin  
Bicêtre Cedex, France

**Table of Central Ethics Committees and Institutional Review Boards**

| <b>Organization</b>                                                                                                             | <b>Address</b>                                                                                         | <b>Study Organization Role</b> |
|---------------------------------------------------------------------------------------------------------------------------------|--------------------------------------------------------------------------------------------------------|--------------------------------|
| Baylor Scott & White Research Institute                                                                                         | 3310 Live Oak, Suite 501, Dallas, TX, United States; 75204                                             | Local IRB\EC                   |
| CEIC - Comissão de Ética para a Investigação Clínica (National Ethics Committee for Clinical Research) Portugal<br>CEC Portugal | Parque da Saúde de Lisboa, Avenida do Brasil, 53 – Pav. 17-A; Lisboa, Portugal, 1749-004               | Central IRB\EC                 |
| CEIC Hospital Universitari de Bellvitge                                                                                         | Inés Sánchez / Montse Cruz / Maite Valdeolivas / Elisa Giménez, Hospitalet de Llobregat, Spain         | Central IRB\EC                 |
| Centrale Commissie Mensgebonden Onderzoek (CCMO)                                                                                | Bezuidenhoutseweg 30, Den Haag, Netherlands, 2594 AV                                                   | Central IRB\EC                 |
| Columbia University Medical Center IRB                                                                                          | 154 Haven Avenue, First Floor, New York, NY, United States, 10032                                      | Local IRB\EC                   |
| Comitato Di Bioetica Dell' I.R.C.C.S. Policlinico San Matteo                                                                    | Comitato Di Bioetica Servizio Amministrativo VLE GOLGI 19, Pavia, Italy, 27100                         | Local IRB\EC                   |
| Comitato Etico della Fondazione Policlinico Universitario Agostino Gemelli IRCCS Università Cattolica del Sacro Cuore           | IRCCS Fondazione Policlinico Universitario A. Gemelli, Largo Agostino Gemelli 8, Roma, Italy, 00168    | Central IRB\EC                 |
| Comitato Etico di Messina - A.O.U. Policlinico "G. Martino"                                                                     | Via Consolare Valeria 1, Padiglione G "Torre Biologica", Piano terra, Messina, Italy, 98125            | Local IRB\EC                   |
| Comitato Etico IRCCS Regione Lombardia - Sezione Fondazione IRCCS Istituto Neurologico Carlo Besta                              | Via Celoria 11, Milano, Italy, 20133                                                                   | Local IRB\EC                   |
| Comité de Ética en Investigación del Instituto Nacional de Ciencias Médicas y Nutrición Salvador Zubirán                        | Avenida Vasco de Quiroga No. 15, Colonia Belisario Domínguez Sección XVI, México, D. F., Mexico, 14080 | Local IRB\EC                   |
| Comité de Ética en Investigaciones Biomédicas Fundación FLENI                                                                   | Montañeses 2325, CABA, Argentina, C1428AQK                                                             | Local IRB\EC                   |
| Comité de Protection des Personnes (CPP) Ile de France X - Aulnay-sous-bois                                                     | Hôpital Robert Ballanger, Boulevard Robert Ballanger,                                                  | Central IRB\EC                 |

|                                                                                                                               |                                                                                                                     |                |
|-------------------------------------------------------------------------------------------------------------------------------|---------------------------------------------------------------------------------------------------------------------|----------------|
|                                                                                                                               | Aulnay-Sous-Bois cedex, France, 93602                                                                               |                |
| Comité d'Ethique - ULB Hôpital Erasme                                                                                         | Route de Lennik 808, Bruxelles, Belgium, 1070                                                                       | Local IRB\EC   |
| CONEP – Comissão Nacional de Ética em Pesquisa                                                                                | SRTV 701, Via W 5 Norte, lote D, Edifício PO 700, 3º andar – Asa Norte, Brasília/DF, Brazil, 70719-040              | Central IRB\EC |
| Cyprus National Bioethics Committee                                                                                           | 22 Laertou St., 2365 Agios Dometios, Nicosia, Cyprus                                                                | Central IRB\EC |
| Ethics Committee for Clinical Trials- Bulgaria                                                                                | 8 Damyan Gruev Street, Sofia, Bulgaria, 1303                                                                        | Central IRB\EC |
| Ethikkommission der Ärztekammer Westfalen-Lippe und der Medizinischen Fakultät der Westfälischen Wilhelms-Universität Münster | Gartenstr. 210 – 214, Münster, Germany, 48147                                                                       | Central IRB\EC |
| Ethikkommission der Landesärztekammer Rheinland-Pfalz                                                                         | Deutschhausplatz 3, Mainz, Germany, 55116                                                                           | Local IRB\EC   |
| Ethikkommission der Medizinischen Fakultät Heidelberg                                                                         | Alte Glockengießerei 11/1, Heidelberg, Germany, 69115                                                               | Local IRB\EC   |
| Ethikkommission des Landes Berlin Landesamt fuer Gesundheit und Soziales (LAGeSo)                                             | Turmstraße 21, Postfach 31 09 29, Berlin, Germany, 10559                                                            | Local IRB\EC   |
| Ethische Commissie Onderzoek UZ/KU Leuven                                                                                     | Herestraat 49, Campus Gasthuisberg E330, Leuven, Belgium, 3000                                                      | Central IRB\EC |
| Etikprövningsmyndigheten (Ethical Review Authority)                                                                           | Box 2110, Uppsala, Sweden, 750 02                                                                                   | Central IRB\EC |
| Institutional Review Board of Osaka University Hospital                                                                       | 2-15 Yamadaoka, Suita-shi, Osaka, Japan, 565-0871                                                                   | Local IRB\EC   |
| Istanbul Universitesi Istanbul Tip Fakultesi Klinik Arastirmalar Etik Kurulu                                                  | Istanbul Universitesi Istanbul Tip Fakultesi Klinik Arastirmalar Etik Kurulu, Fatih / Capa, Istanbul, Turkey, 34093 | Central IRB\EC |
| Konkuk University Medical Center IRB                                                                                          | 120-1 Neungdong-ro (Hwayang-dong), Gwangjin-gu, Seoul, South Korea, 143-729                                         | Local IRB\EC   |
| Kumamoto University Hospital Institutional Review Board                                                                       | 1-1-1 Honjo, Chuo-ku, kumamoto, Kumamoto, Japan, 860-8556                                                           | Local IRB\EC   |
| Kyungpook National University Hospital IRB                                                                                    | 130 Dongdeok-ro, Jung-gu, Daegu, South Korea, 41944                                                                 | Local IRB\EC   |
| Local Ethics Committee at University Multiprofile Hospital for Active Treatment „Alexandrovka“ EAD                            | 1 Georgi Sofiiski Str., Sofia, Bulgaria, 1431                                                                       | Local IRB\EC   |

|                                                                            |                                                                                                    |                |
|----------------------------------------------------------------------------|----------------------------------------------------------------------------------------------------|----------------|
| London - City and East                                                     | Bristol HRA Centre, Level 3, Block B, Whitefriars, Lewins Mead, Bristol, United Kingdom, BS1 2NT   | Central IRB\EC |
| Mater Misericordiae Institutional Review Board                             | Eccles Street, Dublin 7, Ireland                                                                   | Local IRB\EC   |
| Mayo Clinic Institutional Review Board                                     | 201 Building 4-60, 200 First Street SW, Rochester, MN, United States, 55905                        | Local IRB\EC   |
| Mcgill University Health Centre Research Ethics Office                     | 3801 University Street, Room 686, Montreal, Quebec, Canada, H3A 2B4                                | Local IRB\EC   |
| Medical University of South Carolina Office of Research Integrity          | 19 Hagood Avenue, Suite 601, Charleston, SC, United States, 29425                                  | Local IRB\EC   |
| Nagoya University Hospital IRB                                             | 65 Tsurumai-cho, Showa-ku, Aichi, Nagoya, Japan, 466-8560                                          | Local IRB\EC   |
| National Taiwan University Hospital (NTUH) Research Ethics Committee (REC) | No. 7, Chung Shan South Road; Taipei City, Taiwan, 10002                                           | Central IRB\EC |
| National Ethics Committee of Greece                                        | Messogion Avenue 284, Athens, Greece, 15562                                                        | Central IRB\EC |
| Northwestern University Biomedical IRB                                     | IRB Office, 750 N. Lake Shore Drive, Chicago, IL, United States, 60611                             | Local IRB\EC   |
| Oregon Health & Science University (OHSU)                                  | 3181 SW Sam Jackson Park Rd., Mail Code L106-R1, Portland, OR, United States, 97239                | Local IRB\EC   |
| Samsung Medical Center Institutional Review Board                          | Samsung Medical Center, 81 Irwon-Ro, Gangnam-gu, Seoul, South Korea, 06351                         | Local IRB\EC   |
| Shinshu University Hospital IRB                                            | 3-1-1, Asahi, Nagano, Matsumoto, Japan, 390-8621                                                   | Local IRB\EC   |
| Taipei Veterans General Hospital, Institutional Review Board               | No. 201, Shih-Pai Rd, Sec. 2, Taipei, Taiwan, 11217                                                | Local IRB\EC   |
| The Johns Hopkins Medicine IRBs                                            | 1620 McElderry Street, Reed Hall, Baltimore, MD, United States, 21205                              | Local IRB\EC   |
| The University of North Carolina at Chapel Hill                            | 720 Martin Luther King, Jr. Blvd, Bldg. 385, 2nd Floor, Chapel Hill, NC, United States, 27599-7097 | Local IRB\EC   |
| University of British Columbia Clinical Research Ethics Board Office       | Room 210, Research Pavilion, 828 West 10th Avenue, Vancouver, British Columbia, Canada, V5Z 1M9    | Local IRB\EC   |
| University of Iowa IRB                                                     | Hardin Library, Office 105, 600 Newton Rd, Iowa City, IA, United States, 52242-1098                | Local IRB\EC   |

|                                                                                   |                                                                                                                                       |                |
|-----------------------------------------------------------------------------------|---------------------------------------------------------------------------------------------------------------------------------------|----------------|
| University of Malaya Medical Centre Medical Research Ethics Committee (UMMC MREC) | Lembah Pantai, Kuala Lumpur, Malaysia, 59100                                                                                          | Local IRB\EC   |
| Vanderbilt University IRB                                                         | 3319 West End Avenue, Suite 600, Nashville, TN, United States, 37203                                                                  | Local IRB\EC   |
| Western Sydney Local Health District Human Research Ethics                        | Westmead Research Office, Research & Education Network Bldg, Westmead Hospital, Hawkesbury and Darcy Roads, Westmead, Australia, 2145 | Local IRB\EC   |
| WIRB/Copernicus Group (WCG) IRB                                                   | 1019 39th Avenue SE, Suite 120, Puyallup, WA, United States, 98374                                                                    | Central IRB\EC |

## Members of HELIOS-A Collaborators Study Group

| First name | Last name  | Institution                                                                 | Location          | Role/contribution                |
|------------|------------|-----------------------------------------------------------------------------|-------------------|----------------------------------|
| Jonas      | Wixner     | Umeå University Hospital                                                    | Umeå, Sweden      | Primary Investigator             |
| Rolf       | Backlund   | Umeå University Hospital                                                    | Umeå, Sweden      | Primary Study Coordinator        |
| Björn      | Pilebro    | Norrlands Universitetssjukhus                                               | Umeå, Sweden      | Investigator                     |
| Intissar   | Anan       | Norrlands Universitetssjukhus                                               | Umeå, Sweden      | Investigator                     |
| Fredrik    | Edbom      | Norrlands Universitetssjukhus                                               | Umeå, Sweden      | Site Personnel, Sonographer      |
| Anna       | Ekman      | Norrlands Universitetssjukhus                                               | Umeå, Sweden      | Site Personnel, Sonographer      |
| Sandra     | Arvidsson  | Norrlands Universitetssjukhus                                               | Umeå, Sweden      | Site Personnel, Sonographer      |
| Ulrika     | Englund    | Norrlands Universitetssjukhus                                               | Umeå, Sweden      | Study Coordinator                |
| Karin      | Söderberg  | Norrlands Universitetssjukhus                                               | Umeå, Sweden      | Site Personnel, Biomed Scientist |
| Erik       | Nordh      | Norrlands Universitetssjukhus                                               | Umeå, Sweden      | Investigator                     |
| Erica      | Uneus      | Norrlands Universitetssjukhus                                               | Umeå, Sweden      | Investigator                     |
| Kristin    | Samuelsson | Karolinska University Hospital Huddinge                                     | Solna, Sweden     | Primary Investigator             |
| Anna       | Nilzen     | Karolinska University Hospital, Huddinge                                    | Stockholm, Sweden | Primary Study Coordinator        |
| Rayomand   | Press      | Karolinska University Hospital                                              | Stockholm, Sweden | Sub-Investigator                 |
| Mirjam     | Bilecen    | Karolinska University Hospital, Huddinge                                    | Stockholm, Sweden | Former Primary Study Coordinator |
| Teresa     | Coelho     | Centro Hospitalar Universitário do Porto, E.P.E – Unidade Corino de Andrade | Porto, Portugal   | Primary Investigator             |
| Marta      | Novais     | Centro Hospitalar Universitário do Porto, E.P.E – Unidade Corino de Andrade | Porto, Portugal   | Primary Study Coordinator        |
| Patricia   | Rodrigues  | Centro Hospitalar Universitário do Porto, Unit for Biomedical               | Porto, Portugal   | Sub-Investigator                 |

|                     |                  |                                                                                                                            |                    |                   |
|---------------------|------------------|----------------------------------------------------------------------------------------------------------------------------|--------------------|-------------------|
|                     |                  | Research in<br>Medicine of the<br>Institute of<br>Biomedical<br>Sciences Abel<br>Salazar of the<br>University of<br>Porto" |                    |                   |
| Ana                 | Martins da Silva | Centro Hospitalar<br>Universitário do<br>Porto, E.P.E –<br>Unidade Corino de<br>Andrade                                    | Porto,<br>Portugal | Sub-Investigator  |
| Inês                | Cardoso          | Centro Hospitalar<br>Universitário do<br>Porto, E.P.E –<br>Unidade Corino de<br>Andrade                                    | Porto,<br>Portugal | Study Coordinator |
| Carla               | Rodrigues        | Centro Hospitalar<br>Universitário do<br>Porto, E.P.E –<br>Unidade Corino de<br>Andrade                                    | Porto,<br>Portugal | Study Coordinator |
| Joana               | Ramalho          | Centro Hospitalar<br>Universitário do<br>Porto, E.P.E –<br>Unidade Corino de<br>Andrade                                    | Porto,<br>Portugal | Sub-Investigator  |
| Helder              | Martins          | Centro Hospitalar<br>Universitário do<br>Porto, E.P.E –<br>Unidade Corino de<br>Andrade                                    | Porto,<br>Portugal | Sub-Investigator  |
| Mónica              | Silva            | Centro Hospitalar<br>Universitário do<br>Porto, E.P.E –<br>Unidade Corino de<br>Andrade                                    | Porto,<br>Portugal | Sub-Investigator  |
| Nádia               | Guimaraes        | Centro Hospitalar<br>Universitário do<br>Porto, E.P.E –<br>Unidade Corino de<br>Andrade                                    | Porto,<br>Portugal | Sub-Investigator  |
| Javier              | Perez            | Centro Hospitalar<br>Universitário do<br>Porto, E.P.E –<br>Unidade Corino de<br>Andrade                                    | Porto,<br>Portugal | Sub-Investigator  |
| Antonio<br>Hipólito | Reis             | Centro Hospitalar<br>Universitário do<br>Porto, E.P.E –                                                                    | Porto,<br>Portugal | Sub-Investigator  |

|          |                 |                                                                                                                         |                  |                           |
|----------|-----------------|-------------------------------------------------------------------------------------------------------------------------|------------------|---------------------------|
|          |                 | Unidade Corino de Andrade                                                                                               |                  |                           |
| Julia    | Monte           | Centro Hospitalar Universitário do Porto, E.P.E – Unidade Corino de Andrade                                             | Porto, Portugal  | Sub-Investigador          |
| Natalia  | Ferreira        | Centro Hospitalar Universitário do Porto, E.P.E – Unidade Corino de Andrade                                             | Porto, Portugal  | Sub-Investigador          |
| Cristina | Alves           | Centro Hospitalar Universitário do Porto, E.P.E – Unidade Corino de Andrade                                             | Porto, Portugal  | Sub-Investigador          |
| Marcio   | Cardoso         | Centro Hospitalar Universitário do Porto, E.P.E – Unidade Corino de Andrade                                             | Porto, Portugal  | Sub-Investigador          |
| Ricardo  | Teixeira        | Centro Hospitalar Universitário do Porto, E.P.E – Unidade Corino de Andrade                                             | Porto, Portugal  | Sub-Investigador          |
| Isabel   | Conceição       | Centro Hospitalar Universitario de Lisboa Norte, Hospital de Santa Maria                                                | Lisboa, Portugal | Primary Investigator      |
| Filipa   | Lamas           | Centro Hospitalar Universitario de Lisboa Norte, Hospital de Santa Maria                                                | Lisboa, Portugal | Primary Study Coordinator |
| Miguel   | Oliveira Santos | Centro Hospitalar Universitario de Lisboa Norte, Hospital de Santa Maria, Faculdade de Medicina, Universidade de Lisboa | Lisboa, Portugal | Sub-Investigador          |
| Catarina | Campos          | Centro Hospitalar Universitario de Lisboa Norte, Hospital de Santa Maria, Faculdade de Medicina,                        | Lisboa, Portugal | Sub-Investigador          |



|             |                     |                                                                                                                         |                  |                           |
|-------------|---------------------|-------------------------------------------------------------------------------------------------------------------------|------------------|---------------------------|
|             |                     | Universidade de Lisboa                                                                                                  |                  |                           |
| Conceição   | de Azevedo Coutinho | Centro Hospitalar Universitario de Lisboa Norte, Hospital de Santa Maria, Faculdade de Medicina, Universidade de Lisboa | Lisboa, Portugal | Sub-Investigator          |
| José        | Castro              | Centro Hospitalar Universitario de Lisboa Norte, Hospital de Santa Maria, Faculdade de Medicina, Universidade de Lisboa | Lisboa, Portugal | Sub-Investigator          |
| Isabel      | Castro              | Centro Hospitalar Universitario de Lisboa Norte, Hospital de Santa Maria, Faculdade de Medicina, Universidade de Lisboa | Lisboa, Portugal | Sub-Investigator          |
| Daniela     | Silva               | Centro Hospitalar Universitario de Lisboa Norte, Hospital de Santa Maria                                                | Lisboa, Portugal | Sub-Investigator          |
| Susana      | Gonçalves           | Centro Hospitalar Universitario de Lisboa Norte, Hospital de Santa Maria                                                | Lisboa, Portugal | Sub-Investigator          |
| Laura Piera | Obici               | Fondazione IRCCS Policlinico San Matteo                                                                                 | Pavia, Italy     | Primary Investigator      |
| Eleonora    | Di Buduo            | Fondazione IRCCS Policlinico San Matteo                                                                                 | Pavia, Italy     | Primary Study Coordinator |
| Claudia     | Sforzini            | Fondazione IRCCS Policlinico San Matteo                                                                                 | Pavia, Italy     | Study Coordinator         |
| Roberta     | Mussinelli          | Fondazione IRCCS Policlinico San Matteo                                                                                 | Pavia, Italy     | Sub-Investigator          |
| Vittorio    | Rosti               | Fondazione IRCCS Policlinico San Matteo                                                                                 | Pavia, Italy     | Sub-Investigator          |

|            |                |                                                                                                                                    |                   |                      |
|------------|----------------|------------------------------------------------------------------------------------------------------------------------------------|-------------------|----------------------|
| Alessandro | Lozza          | Fondazione IRCCS<br>Policlinico San<br>Matteo                                                                                      | Pavia,<br>Italy   | Neurologist          |
| Anna       | Racchi         | Fondazione IRCCS<br>Policlinico San<br>Matteo                                                                                      | Pavia,<br>Italy   | Pharmacist           |
| Mario      | Sabatelli      | Centro Clinico<br>NEMO, Fondazione<br>Policlinico<br>Universitario A.<br>Gemelli IRCCS,<br>Università Cattolica<br>del Sacro Cuore | Rome,<br>Italy    | Primary Investigator |
| Marco      | Luigetti       | Fondazione<br>Policlinico<br>Universitario A.<br>Gemelli IRCCS,<br>Università Cattolica<br>del Sacro Cuore                         | Rome,<br>Italy    | Sub-Investigator     |
| Giulia     | Bisogni        | Centro Clinico<br>NEMO, Fondazione<br>Policlinico<br>Universitario A.<br>Gemelli IRCCS                                             | Rome,<br>Italy    | Sub-Investigator     |
| Angela     | Romano         | Fondazione<br>Policlinico<br>Universitario A.<br>Gemelli IRCCS,<br>Università Cattolica<br>del Sacro Cuore                         | Rome,<br>Italy    | Sub-Investigator     |
| Valeria    | Guglielmino    | Fondazione<br>Policlinico<br>Universitario A.<br>Gemelli IRCCS,<br>Università Cattolica<br>del Sacro Cuore                         | Rome,<br>Italy    | Sub-Investigator     |
| Andrea     | Di Paolantonio | Fondazione<br>Policlinico<br>Universitario A.<br>Gemelli IRCCS,<br>Università Cattolica<br>del Sacro Cuore                         | Rome,<br>Italy    | Sub-Investigator     |
| Daniela    | Bernardo       | Centro Clinico<br>NEMO, Fondazione<br>Policlinico<br>Universitario A.<br>Gemelli IRCCS                                             | Rome,<br>Italy    | Sub-Investigator     |
| Giuseppe   | Vita           | A.O.U. Policlinico<br>"G. Martino"                                                                                                 | Messina,<br>Italy | Primary Investigator |
| Anna       | Mazzeo         | A.O.U. Policlinico<br>"G. Martino"                                                                                                 | Messina,<br>Italy | Sub-Investigator     |

|          |           |                                                                                                                                     |                               |                                                  |
|----------|-----------|-------------------------------------------------------------------------------------------------------------------------------------|-------------------------------|--------------------------------------------------|
| Massimo  | Russo     | A.O.U. Policlinico<br>"G. Martino"                                                                                                  | Messina,<br>Italy             | Sub-Investigator                                 |
| Davide   | Pareyson  | Fondazione IRCCS<br>Istituto<br>Neurologico Carlo<br>Besta                                                                          | Milano,<br>Italy              | Primary Investigator                             |
| Daniela  | Calabrese | Fondazione IRCCS<br>Istituto<br>Neurologico Carlo<br>Besta                                                                          | Milano,<br>Italy              | Primary Study<br>Coordinator                     |
| Silvia   | Fenu      | Fondazione IRCCS<br>Istituto<br>Neurologico Carlo<br>Besta                                                                          | Milano,<br>Italy              | Sub-Investigator                                 |
| Paola    | Saveri    | Fondazione IRCCS<br>Istituto<br>Neurologico Carlo<br>Besta                                                                          | Milano,<br>Italy              | Collaborator<br>(patient's sample<br>management) |
| Hans     | Nienhuis  | Groningen<br>Amyloidosis Center<br>of Expertise, UMCG                                                                               | Groningen,<br>The Netherlands | Primary Investigator                             |
| Geert    | Bokhorst  | Groningen<br>Amyloidosis Center<br>of Expertise, UMCG                                                                               | Groningen,<br>The Netherlands | Primary Study<br>Coordinator                     |
| Carlien  | Roos      | Groningen<br>Amyloidosis Center<br>of Expertise, UMCG                                                                               | Groningen,<br>The Netherlands | Study Coordinator                                |
| Margriet | Couperus  | Groningen<br>Amyloidosis Center<br>of Expertise, UMCG                                                                               | Groningen,<br>The Netherlands | Study Coordinator                                |
| Greetje  | De Jong   | Groningen<br>Amyloidosis Center<br>of Expertise, UMCG                                                                               | Groningen,<br>The Netherlands | Study Coordinator                                |
| Anne     | Brunger   | Groningen<br>Amyloidosis Center<br>of Expertise, UMCG                                                                               | Groningen, The<br>Netherlands | Sub-Investigator                                 |
| Gea      | Drost     | Groningen<br>Amyloidosis Center<br>of Expertise, UMCG                                                                               | Groningen,<br>The Netherlands | Neurophysiological<br>Assessments                |
| Fiete    | Lange     | Groningen<br>Amyloidosis Center<br>of Expertise, UMCG                                                                               | Groningen,<br>The Netherlands | Neurophysiological<br>Assessments                |
| Adinda   | Colauto   | Groningen<br>Amyloidosis Center<br>of Expertise,<br>UMCG,<br>Department of<br>Neurology,<br>University Medical<br>Center Groningen, | Groningen,<br>The Netherlands | Neurophysiological<br>Assessments                |

|             |                       |                                                                                                         |                                  |                           |
|-------------|-----------------------|---------------------------------------------------------------------------------------------------------|----------------------------------|---------------------------|
|             |                       | University of Groningen                                                                                 |                                  |                           |
| Márcia      | Waddington-Cruz       | CEPARM, National Amyloidosis Referral Center, University Hospital, Federal University of Rio de Janeiro | Rio de Janeiro, Brazil           | Primary Investigator      |
| Aline       | Abreu                 | CEPARM, National Amyloidosis Referral Center, University Hospital, Federal University of Rio de Janeiro | Rio de Janeiro, Brazil           | Primary Study Coordinator |
| Roberto     | Coury Pedrosa         | CEPARM, National Amyloidosis Referral Center, University Hospital, Federal University of Rio de Janeiro | Rio de Janeiro, Brazil           | Sub-Investigator          |
| Renata      | Gervais de Santa Rosa | CEPARM, National Amyloidosis Referral Center, University Hospital, Federal University of Rio de Janeiro | Rio de Janeiro, Brazil           | Sub-Investigator          |
| Moisés      | Dias                  | CEPARM, National Amyloidosis Referral Center, University Hospital, Federal University of Rio de Janeiro | Rio de Janeiro, Brazil           | Sub-Investigator          |
| David       | Adams                 | CHU Bicetre, AP-HP, University Paris Saclay                                                             | Le Kremlin Bicêtre cedex, France | Primary Investigator      |
| Fetra       | Rakotondratifika      | CHU Bicetre, AP-HP                                                                                      | Le Kremlin Bicêtre cedex, France | Primary Study Coordinator |
| Andoni      | Echaniz-Laguna        | CHU Bicetre, AP-HP, University Paris Saclay                                                             | Le Kremlin Bicêtre cedex, France | Sub-Investigator          |
| Cecile      | Cauquil               | CHU Bicetre, AP-HP                                                                                      | Le Kremlin Bicêtre cedex, France | Sub-Investigator          |
| Céline      | Labeyrie              | CHU Bicetre, AP-HP                                                                                      | Le Kremlin Bicêtre cedex, France | Sub-Investigator          |
| Guillemette | Beaudonnet            | CHU Bicetre, AP-HP                                                                                      | Le Kremlin Bicêtre cedex, France | Sub-Investigator          |

|            |                       |                                                                            |                                        |                              |
|------------|-----------------------|----------------------------------------------------------------------------|----------------------------------------|------------------------------|
| Yasmine    | Boubrit               | CHU Bicetre, AP-HP                                                         | Le Kremlin<br>Bicêtre cedex,<br>France | Study Coordinator            |
| Amina      | Gaouar                | CHU Bicetre, AP-HP                                                         | Le Kremlin<br>Bicêtre cedex,<br>France | Study Coordinator            |
| Halima     | Bourenane             | CHU Bicetre, AP-HP                                                         | Le Kremlin<br>Bicêtre cedex,<br>France | Study Coordinator            |
| Shahram    | Attarian              | Centre de<br>Référence des<br>Maladies<br>Neuromusculaires<br>et de la SLA | Marseille,<br>France                   | Primary Investigator         |
| El Khansa  | Yahia                 | Centre de<br>Référence des<br>Maladies<br>Neuromusculaires<br>et de la SLA | Marseille,<br>France                   | Primary Study<br>Coordinator |
| Annie      | Verschueren           | Centre de<br>Référence des<br>Maladies<br>Neuromusculaires<br>et de la SLA | Marseille,<br>France                   | Sub-Investigator             |
| Aude-Marie | Grapperon             | Centre de<br>Référence des<br>Maladies<br>Neuromusculaires<br>et de la SLA | Marseille,<br>France                   | Sub-Investigator             |
| Emilien    | Delmont               | Centre de<br>Référence des<br>Maladies<br>Neuromusculaires<br>et de la SLA | Marseille,<br>France                   | Sub-Investigator             |
| Violaine   | Planté-<br>Bordeneuve | CHU Henri Mondor                                                           | Créteil,<br>France                     | Primary Investigator         |
| Laetitia   | Vervoitte             | CHU Henri Mondor                                                           | Créteil,<br>France                     | Primary Study<br>Coordinator |
| Samar S.   | Ayache                | CHU Henri Mondor                                                           | Créteil,<br>France                     | Sub-Investigator             |
| Philippe   | Le Corvoisier         | CHU Henri Mondor                                                           | Créteil,<br>France                     | Sub-Investigator             |
| Raphaele   | Arrouasse             | CHU Henri Mondor                                                           | Créteil,<br>France                     | Sub-Investigator             |
| Thierry    | Gendre                | CHU Henri Mondor                                                           | Créteil,<br>France                     | Sub-Investigator             |
| Laure      | Abou Chakra           | CHU Henri Mondor                                                           | Créteil,<br>France                     | Sub-Investigator             |
| Cécile     | Focsénéanu            | CHU Henri Mondor                                                           | Créteil,<br>France                     | Study Nurse                  |

|                 |                       |                                                                                |                            |                              |
|-----------------|-----------------------|--------------------------------------------------------------------------------|----------------------------|------------------------------|
| Caroline        | Barau                 | CHU Henri Mondor                                                               | Créteil,<br>France         | Sub-Investigator             |
| Guilhem         | Sole                  | CHU Bordeaux,<br>Hôpital Pellegrin                                             | Bordeaux,<br>France        | Primary Investigator         |
| Laurie          | Belin                 | CHU Bordeaux,<br>Hôpital Pellegrin                                             | Bordeaux,<br>France        | Primary Study<br>Coordinator |
| Marie<br>Helene | Violleau              | CHU Bordeaux,<br>Hôpital Pellegrin                                             | Bordeaux,<br>France        | Study Coordinator            |
| Fanny           | Duval-Bontemps        | CHU Bordeaux,<br>Hôpital Pellegrin                                             | Bordeaux,<br>France        | Sub-Investigator             |
| Rami            | Massie                | Montreal<br>Neurological<br>Institute                                          | Monreal,<br>Quebec, Canada | Primary Investigator         |
| Xin             | Dong                  | Montreal<br>Neurological<br>Institute                                          | Monreal,<br>Quebec, Canada | Primary Study<br>Coordinator |
| Francisco       | Muñoz-Beamud          | Hospital<br>Universitario Juan<br>Ramon Jimenez                                | Huelva,<br>Spain           | Primary Investigator         |
| Sandra          | García Garrido        | Hospital<br>Universitario Juan<br>Ramon Jimenez                                | Huelva,<br>Spain           | Primary Study<br>Coordinator |
| Cristina        | Borrachero            | Hospital<br>Universitario Juan<br>Ramon Jimenez                                | Huelva,<br>Spain           | Sub-Investigator             |
| Alvaro          | Gragera Martinez      | Hospital<br>Universitario Juan<br>Ramon Jimenez                                | Huelva,<br>Spain           | Sub-Investigator             |
| Lucía           | Galán Dávila          | Hospital Clinico San<br>Carlos                                                 | Madrid,<br>Spain           | Primary Investigator         |
| Marta           | Palacios              | Hospital Clinico San<br>Carlos                                                 | Madrid,<br>Spain           | Primary Study<br>Coordinator |
| Laura M.        | Vicente               | Hospital Clinico San<br>Carlos                                                 | Madrid,<br>Spain           | Sub-Investigator             |
| Leopoldo        | Perez de Isla         | Hospital Clinico San<br>Carlos                                                 | Madrid,<br>Spain           | Sub-Investigator             |
| Carlos          | Casasnovas            | Hospital<br>Universitari de<br>Bellvitge                                       | Barcelona,<br>Spain        | Principle<br>Investigator    |
| Carles          | Díez López            | Hospital<br>Universitari de<br>Bellvitge                                       | Barcelona,<br>Spain        | Sub-Investigator             |
| Elena           | Fabra                 | Hospital<br>Universitari de<br>Bellvitge                                       | Barcelona,<br>Spain        | Back-Up Study<br>Coordinator |
| José            | González-<br>Costello | Cardiology<br>Department,<br>Hospital<br>Universitari de<br>Bellvitge, IDIBELL | Barcelona,<br>Spain        | Principal<br>Investigator    |

|           |                  |                                               |                               |                              |
|-----------|------------------|-----------------------------------------------|-------------------------------|------------------------------|
| Sonia     | Guerrero         | Hospital<br>Universitari de<br>Bellvitge      | Barcelona,<br>Spain           | Primary Study<br>Coordinator |
| Sergi     | Yun Viladomat    | Hospital<br>Universitari de<br>Bellvitge      | Barcelona,<br>Spain           | Sub-Investigator             |
| Yurema    | Martinez         | Hospital<br>Universitari de<br>Bellvitge      | Barcelona,<br>Spain           | Back-Up Study<br>Coordinator |
| Valentina | Velez-Santamaria | Hospital<br>Universitari de<br>Bellvitge      | Barcelona,<br>Spain           | Sub-Investigator             |
| Velina    | Nedkova-Hristova | Hospital<br>Universitari de<br>Bellvitge      | Barcelona,<br>Spain           | Sub-Investigator             |
| Pablo     | Garcia Pavia     | Hospital<br>Universitario<br>Puerta de Hierro | Majadahonda,<br>Madrid, Spain | Primary Investigator         |
| Ariadna   | Gonzalez Segovia | Hospital<br>Universitario<br>Puerta de Hierro | Majadahonda,<br>Madrid, Spain | Primary Study<br>Coordinator |
| Fernando  | De Frutos        | Hospital<br>Universitario<br>Puerta de Hierro | Majadahonda,<br>Madrid, Spain | Sub-Investigator             |
| Esther    | Gonzalez-Lopez   | Hospital<br>Universitario<br>Puerta de Hierro | Majadahonda,<br>Madrid, Spain | Sub-Investigator             |
| Fernando  | Dominguez        | Hospital<br>Universitario<br>Puerta de Hierro | Majadahonda,<br>Madrid, Spain | Sub-Investigator             |
| Luis E.   | Escobar-López    | Hospital<br>Universitario<br>Puerta de Hierro | Madrid,<br>Spain              | Sub-Investigator             |
| Eva       | Cabrera-Romero   | Hospital<br>Universitario<br>Puerta de Hierro | Madrid,<br>Spain              | Sub-Investigator             |
| Paula     | Sánchez Gismera  | Hospital<br>Universitario<br>Puerta de Hierro | Majadahonda,<br>Madrid, Spain | Primary Study<br>Coordinator |
| María     | de la Iglesia    | Hospital<br>Universitario<br>Puerta de Hierro | Majadahonda,<br>Madrid, Spain | Back-Up Study<br>Coordinator |
| Fernando  | Martinez Valle   | Hospital<br>Universitario Vall<br>d'Hebron    | Barcelona,<br>Spain           | Primary Investigator         |
| Gonzalo   | Mazuela Aguila   | Hospital<br>Universitario Vall<br>d'Hebron    | Barcelona,<br>Spain           | Back-Up Study<br>Coordinator |
| Karen     | Lorite           | Hospital<br>Universitario Vall<br>d'Hebron    | Barcelona,<br>Spain           | Primary Study<br>Coordinator |

|            |                 |                                                                            |                   |                                |
|------------|-----------------|----------------------------------------------------------------------------|-------------------|--------------------------------|
| Núria      | Raguer          | Hospital Universitario Vall d'Hebron                                       | Barcelona, Spain  | Sub-Investigator               |
| Pilar      | Suñé            | Hospital Universitario Vall d'Hebron                                       | Barcelona, Spain  | Pharmacist                     |
| Pablo      | Piera           | Hospital Universitario Vall d'Hebron                                       | Barcelona, Spain  | Pharmacist                     |
| Carlos     | Ortega          | Hospital Universitario Vall d'Hebron                                       | Barcelona, Spain  | Pharmacist                     |
| Carla      | Aguilar         | Hospital Universitario Vall d'Hebron                                       | Barcelona, Spain  | Study nurse                    |
| Gisela     | Gili            | Hospital Universitario Vall d'Hebron                                       | Barcelona, Spain  | Study nurse                    |
| Hartmut    | Schmidt         | Universitaetsklinikum Muenster                                             | Muenster, Germany | Primary Investigator           |
| Christel   | Langenstroer    | Universitaetsklinikum Muenster                                             | Muenster, Germany | Primary Study Coordinator      |
| Anna       | Hüsing-Kabar    | Universitaetsklinikum Muenster                                             | Muenster, Germany | Primary Investigator           |
| Ilyad      | Kabar           | Universitaetsklinikum Muenster                                             | Muenster, Germany | Sub-Investigator, Cardiologist |
| Matthias   | Schilling       | Universitaetsklinikum Muenster                                             | Muenster, Germany | Sub-Investigator, Neurologist  |
| Frauke     | Friebel         | Universitaetsklinikum Muenster                                             | Muenster, Germany | Back-Up Study Coordinator      |
| Phil-Robin | Tepasse         | Universitaetsklinikum Muenster                                             | Muenster, Germany | Deputy PI                      |
| Frank      | Birklein        | Johannes Gutenberg Universität Mainz, Klinik und Poliklinik für Neurologie | Mainz, Germany    | Primary Investigator           |
| Monika     | Firros          | Johannes Gutenberg Universität Mainz, Klinik und Poliklinik für Neurologie | Mainz, Germany    | Primary Study Coordinator      |
| Fabiola    | Escolano-Lozano | Johannes Gutenberg Universität Mainz, Klinik und Poliklinik für Neurologie | Mainz, Germany    | Sub-Investigator               |
| John       | Berk            | Amyloidosis Center, Boston University School of Medicine                   | Boston, MA, USA   | Primary Investigator           |



|               |               |                                                          |                    |                           |
|---------------|---------------|----------------------------------------------------------|--------------------|---------------------------|
| Caitlin       | Brueckner     | Amyloidosis Center, Boston University School of Medicine | Boston, MA, USA    | Primary Study Coordinator |
| Vanessa       | Bahnam        | Amyloidosis Center, Boston University School of Medicine | Boston, MA, USA    | Back-Up Study Coordinator |
| Michelle C.   | Kaku          | Amyloidosis Center, Boston University School of Medicine | Boston, MA, USA    | Neurology                 |
| K. H. Vincent | Lau           | Amyloidosis Center, Boston University School of Medicine | Boston, MA, USA    | Neurology                 |
| Janice        | Wiesman       | Amyloidosis Center, Boston University School of Medicine | Boston, MA, USA    | Neurology                 |
| Martha        | Grogan        | Mayo Clinic, Rochester                                   | Rochester, MN, USA | Primary Investigator      |
| Susanna       | Miller        | Mayo Clinic, Rochester                                   | Rochester, MN, USA | Primary Study Coordinator |
| Janell        | Frantz        | Mayo Clinic, PPDS                                        | Rochester, MN, USA | Sub-Investigator          |
| Diane C.      | Schmidt       | Mayo Clinic, PPDS                                        | Rochester, MN, USA | Sub-Investigator          |
| Omar          | AbouEzzeddine | Mayo Clinic, PPDS                                        | Rochester, MN, USA | Sub-Investigator          |
| Wayne         | Miller        | Mayo Clinic, PPDS                                        | Rochester, MN, USA | Sub-Investigator          |
| Grace         | Lin           | Mayo Clinic, PPDS                                        | Rochester, MN, USA | Sub-Investigator          |
| Morie         | Gertz         | Mayo Clinic, PPDS                                        | Rochester, MN, USA | Sub-Investigator          |
| Angela        | Dispenzieri   | Mayo Clinic, PPDS                                        | Rochester, MN, USA | Sub-Investigator          |
| Thomas        | Brannagan     | Columbia University Medical Center                       | New York, NY, USA  | Primary Investigator      |
| Raisy         | Fayerman      | Columbia University Medical Center                       | New York, NY, USA  | Study Coordinator         |
| Elizabeth     | DuVerger      | Columbia University Medical Center                       | New York, NY, USA  | Study Coordinator         |
| Jorge         | Cabrera       | Columbia University Medical Center                       | New York, NY, USA  | Primary Study Coordinator |

|              |          |                                                  |                   |                           |
|--------------|----------|--------------------------------------------------|-------------------|---------------------------|
| Mathew S.    | Maurer   | Columbia University Medical Center               | New York, NY, USA | Sub-Investigator          |
| Christina M. | Ulane    | Columbia University Medical Center               | New York, NY, USA | Sub-Investigator          |
| Louis H.     | Weimer   | Columbia University Medical Center               | New York, NY, USA | Sub-Investigator          |
| Stephen      | Tsang    | Columbia University Medical Center               | New York, NY, USA | Sub-Investigator          |
| Jeffrey      | Shije    | Columbia University Medical Center               | New York, NY, USA | Sub-Investigator          |
| Nathan       | Carberry | Columbia University Medical Center               | New York, NY, USA | Sub-Investigator          |
| Sai Si       | Thu      | Columbia University Medical Center               | New York, NY, USA | Sub-Investigator          |
| Dianna       | Quan     | University of Colorado, Anschutz Medical Campus  | Aurora, CO, USA   | Primary Investigator      |
| Brianna      | Blume    | University of Colorado, Anschutz Medical Campus  | Aurora, CO, USA   | Primary Study Coordinator |
| J. Scott     | Overcash | Velocity Clinical Research, San Diego, ERN, PPDS | La Mesa, CA, USA  | Primary Investigator      |
| He (Helen)   | Pu       | Velocity Clinical Research, San Diego, ERN, PPDS | La Mesa, CA, USA  | Primary Study Coordinator |
| Kia          | Lee      | Velocity Clinical Research, San Diego, ERN, PPDS | La Mesa, CA, USA  | Sub-Investigator          |
| Hanh         | Chu      | Velocity Clinical Research, San Diego, ERN, PPDS | La Mesa, CA, USA  | Sub-Investigator          |
| Karla        | Zepeda   | Velocity Clinical Research, San Diego, ERN, PPDS | La Mesa, CA, USA  | Sub-Investigator          |
| Michael      | Waters   | Velocity Clinical Research, San Diego, ERN, PPDS | La Mesa, CA, USA  | Sub-Investigator          |
| Thao         | Vuong    | Velocity Clinical Research, San Diego, ERN, PPDS | La Mesa, CA, USA  | Study Coordinator         |
| Derya        | Coskun   | Velocity Clinical Research, San Diego, ERN, PPDS | La Mesa, CA, USA  | Sub-Investigator          |

|          |               |                                                  |                       |                               |
|----------|---------------|--------------------------------------------------|-----------------------|-------------------------------|
| Kimberly | Quillin       | Velocity Clinical Research, San Diego, ERN, PPDS | La Mesa, CA, USA      | Study Nurse                   |
| Allison  | Davis         | Velocity Clinical Research, San Diego, ERN, PPDS | La Mesa, CA, USA      | Site Director                 |
| Michael  | Polydefkis    | Johns Hopkins Medicine                           | Baltimore, MD, USA    | Primary Investigator          |
| Jing     | Ye            | Johns Hopkins Medicine                           | Baltimore, MD, USA    | Primary Study Coordinator     |
| Xiaoling | Li            | Johns Hopkins Medicine                           | Baltimore, MD, USA    | Sub-Investigator              |
| Mohammad | Khoshnoodi    | Johns Hopkins Medicine                           | Baltimore, MD, USA    | Sub-Investigator              |
| Geno     | Vista         | Johns Hopkins Medicine                           | Baltimore, MD, USA    | Sub-Investigator              |
| Tae Hwan | Chung         | Johns Hopkins Medicine                           | Baltimore, MD, USA    | Sub-Investigator              |
| Michele  | Watt          | Johns Hopkins Medicine                           | Baltimore, MD, USA    | Sub-Investigator              |
| Dan      | Tsottles      | Johns Hopkins Medicine                           | Baltimore, MD, USA    | QST/HRdb Assessor             |
| Ahmad    | Masri         | Oregon Health & Science University (OHSU)        | Portland, OR, USA     | Primary Investigator          |
| Dayna    | Carlson       | Oregon Health & Science University (OHSU)        | Portland, OR, USA     | Primary Study Coordinator     |
| Brian    | Drachman      | Penn Presbyterian Medical Center                 | Philadelphia, PA, USA | Primary Investigator          |
| Patricia | Divito        | Penn Presbyterian Medical Center                 | Philadelphia, PA, USA | Primary Study Coordinator     |
| Hansie   | Mathelier     | Penn Presbyterian Medical Center                 | Philadelphia, PA, USA | Sub-Investigator              |
| Margaret | Shanks        | Penn Presbyterian Medical Center                 | Philadelphia, PA, USA | Sub-Investigator              |
| Karen    | Maslowski     | Penn Presbyterian Medical Center                 | Philadelphia, PA, USA | Back-Up Study Coordinator     |
| Sami     | Khella        | Penn Presbyterian Medical Center                 | Philadelphia, PA, USA | Sub-Investigator              |
| Janice   | Pieretti      | Penn Presbyterian Medical Center                 | Philadelphia, PA, USA | Sub-Investigator              |
| Senda    | Ajrourd-Driss | Northwestern University                          | Chicago, IL, USA      | Primary Investigator          |
| Benjamin | Joslin        | Northwestern University                          | Chicago, IL, USA      | Primary Study Coordinator     |
| Emma     | Schmidt       | Northwestern University                          | Chicago, IL, USA      | Clinical Research Coordinator |
| Miriam   | Freimer       | Ohio State University (OSU)                      | Columbus, OH, USA     | Primary Investigator          |

|           |                 |                                                                                 |                                                     |                              |
|-----------|-----------------|---------------------------------------------------------------------------------|-----------------------------------------------------|------------------------------|
|           |                 | College of<br>Medicine                                                          |                                                     |                              |
| Julie     | Agriesti        | Ohio State<br>University (OSU)<br>College of<br>Medicine                        | Columbus,<br>OH, USA                                | Primary Study<br>Coordinator |
| Fabio     | Barroso         | Instituto FLENI                                                                 | Ciudad<br>Autonoma de<br>Buenos Aires,<br>Argentina | Primary Investigator         |
| Florencia | Picone          | Instituto FLENI                                                                 | Ciudad<br>Autonoma de<br>Buenos Aires,<br>Argentina | Primary Study<br>Coordinator |
| Andrea    | Lautre          | Instituto FLENI                                                                 | Ciudad<br>Autonoma de<br>Buenos Aires,<br>Argentina | Sub-Investigator             |
| Lucas     | Orellana        | Instituto FLENI                                                                 | Ciudad<br>Autonoma de<br>Buenos Aires,<br>Argentina | Sub-Investigator             |
| Parag     | Kale            | Baylor University<br>Medical Center                                             | Dallas,<br>TX, USA                                  | Primary Investigator         |
| Wenqin    | Du              | Baylor University<br>Medical Center                                             | Dallas,<br>TX, USA                                  | Research<br>coordinator      |
| Joost     | Felius          | Baylor University<br>Medical Center                                             | Dallas,<br>TX, USA                                  | Research Director            |
| Alejandra | González-Duarte | Instituto Nacional<br>de Ciencias<br>Médicas y<br>Nutrición Salvador<br>Zubiran | Ciudad de<br>México (CDMX),<br>Mexico               | Primary Investigator         |
| Karla     | Cardenas Soto   | Instituto Nacional<br>de Ciencias<br>Médicas y<br>Nutrición Salvador<br>Zubiran | Ciudad de<br>México (CDMX),<br>Mexico               | Primary Study<br>Coordinator |
| Rebecca   | Traub           | University of North<br>Carolina (UNC),<br>Chapel Hill                           | Chapel Hill,<br>NC, USA                             | Primary Investigator         |
| Manisha   | Chopra          | University of North<br>Carolina (UNC),<br>Chapel Hill                           | Chapel Hill,<br>NC, USA                             | Primary Study<br>Coordinator |
| Chi-Chao  | Chao            | National Taiwan<br>University Hospital                                          | Taipei City,<br>Taiwan                              | Primary Investigator         |
| Chia-Hua  | Hsu             | National Taiwan<br>University Hospital                                          | Taipei City,<br>Taiwan                              | Primary Study<br>Coordinator |
| Li-Kai    | Tsai            | National Taiwan<br>University Hospital                                          | Taipei City,<br>Taiwan                              | Sub-Investigator             |

|             |             |                                                                                                              |                     |                           |
|-------------|-------------|--------------------------------------------------------------------------------------------------------------|---------------------|---------------------------|
| Ming-Jen    | Lee         | National Taiwan University Hospital                                                                          | Taipei City, Taiwan | Sub-Investigator          |
| Jen-Jen     | Su          | National Taiwan University Hospital                                                                          | Taipei City, Taiwan | Sub-Investigator          |
| Sung-Tsang  | Hsieh       | National Taiwan University Hospital                                                                          | Taipei City, Taiwan | Sub-Investigator          |
| Hsueh-Wen   | Hsueh       | National Taiwan University Hospital                                                                          | Taipei City, Taiwan | Sub-Investigator          |
| Kon-Ping    | Lin         | Taipei Veterans General Hospital                                                                             | Taipei City, Taiwan | Primary Investigator      |
| Hsi-Chieh   | Chou        | Taipei Veterans General Hospital                                                                             | Taipei City, Taiwan | Primary Study Coordinator |
| Byoung-Joon | Kim         | Samsung Medical Center                                                                                       | Seoul, South Korea  | Primary Investigator      |
| Hyesun      | Kang        | Samsung Medical Center                                                                                       | Seoul, South Korea  | Primary Study Coordinator |
| Ju-Hong     | Min         | Samsung Medical Center                                                                                       | Seoul, South Korea  | Sub-Investigator          |
| Eun-Seok    | Jeon        | Samsung Medical Center                                                                                       | Seoul, South Korea  | Sub-Investigator          |
| Yeon Hak    | Chung       | Samsung Medical Center                                                                                       | Seoul, South Korea  | Sub-Investigator          |
| Jae Hong    | Park        | Samsung Medical Center                                                                                       | Seoul, South Korea  | Sub-Investigator          |
| Jeeyoung    | Oh          | Konkuk University Medical Center                                                                             | Seoul, South Korea  | Primary Investigator      |
| Hyun Joo    | Jeong       | Konkuk University Medical Center                                                                             | Seoul, South Korea  | Primary Study Coordinator |
| Ivailo      | Tournev     | UMHAT Aleksandrovska Sofia, Clinic of Neurology Diseases, Department of Neurology, Medical University, Sofia | Sofia, Bulgaria     | Primary Investigator      |
| Sashka      | Zhelyazkova | UMHAT Aleksandrovska Sofia, Clinic of Neurology Diseases, Department of Neurology, Medical University, Sofia | Sofia, Bulgaria     | Primary Study Coordinator |
| Yohei       | Misumi      | Kumamoto University Hospital                                                                                 | Kumamoto, Japan     | Primary Investigator      |
| Yumiko      | Sakamoto    | Kumamoto University Hospital                                                                                 | Kumamoto, Japan     | Primary Study Coordinator |
| Nami        | Hashimoto   | Kumamoto University Hospital                                                                                 | Kumamoto, Japan     | Study Coordinator         |

|           |           |                              |                  |                           |
|-----------|-----------|------------------------------|------------------|---------------------------|
| Yoshimi   | Misumi    | Kumamoto University Hospital | Kumamoto, Japan  | Study Coordinator         |
| Aya       | Takahashi | Kumamoto University Hospital | Kumamoto, Japan  | Study Coordinator         |
| Mitsuharu | Ueda      | Kumamoto University Hospital | Kumamoto, Japan  | Sub-Investigator          |
| Teruaki   | Masuda    | Kumamoto University Hospital | Kumamoto, Japan  | Sub-Investigator          |
| Akihiko   | Ueda      | Kumamoto University Hospital | Kumamoto, Japan  | Sub-Investigator          |
| Masahisa  | Katsuno   | Nagoya University Hospital   | Aichi, Japan     | Principal Investigator    |
| Kazuki    | Tajima    | Nagoya University Hospital   | Aichi, Japan     | Study Coordinator         |
| Momoko    | Sumi      | Nagoya University Hospital   | Aichi, Japan     | Study Coordinator         |
| Fujiko    | Hasegawa  | Nagoya University Hospital   | Aichi, Japan     | Study Coordinator         |
| Takahiro  | Okumura   | Nagoya University Hospital   | Aichi, Japan     | Sub-Investigator          |
| Haruki    | Koike     | Nagoya University Hospital   | Aichi, Japan     | Sub-Investigator          |
| Masahiro  | Iijima    | Nagoya University Hospital   | Aichi, Japan     | Sub-Investigator          |
| Yuki      | Fukami    | Nagoya University Hospital   | Aichi, Japan     | Sub-Investigator          |
| Daisuke   | Ito       | Nagoya University Hospital   | Aichi, Japan     | Sub-Investigator          |
| Yoshiyuki | Kishimoto | Nagoya University Hospital   | Aichi, Japan     | Sub-Investigator          |
| Tomoyuki  | Kazuta    | Nagoya University Hospital   | Aichi, Japan     | Sub-Investigator          |
| Katsuhiko | Kato      | Nagoya University Hospital   | Aichi, Japan     | Sub-Investigator          |
| Naohiro   | Mouri     | Nagoya University Hospital   | Aichi, Japan     | Sub-Investigator          |
| Soma      | Furukawa  | Nagoya University Hospital   | Aichi, Japan     | Sub-Investigator          |
| Ryoji     | Nishi     | Nagoya University Hospital   | Aichi, Japan     | Sub-Investigator          |
| Yoshiki   | Sekijima  | Shinshu University Hospital  | Matsumoto, Japan | Primary Investigator      |
| Keiko     | Ito       | Shinshu University Hospital  | Matsumoto, Japan | Primary Study Coordinator |
| Nagaaki   | Kato      | Shinshu University Hospital  | Matsumoto, Japan | Sub-Investigator          |
| Dai       | Kishida   | Shinshu University Hospital  | Matsumoto, Japan | Sub-Investigator          |
| Hideki    | Mochizuki | Osaka University Hospital    | Osaka, Japan     | Primary Investigator      |

|                |           |                                                                     |              |                           |
|----------------|-----------|---------------------------------------------------------------------|--------------|---------------------------|
| Kaori          | Okada     | Osaka University Hospital                                           | Osaka, Japan | Primary Study Coordinator |
| Kurumi         | Ohashi    | Osaka University Hospital                                           | Osaka, Japan | Study Coordinator         |
| Kensuke        | Ikenaka   | Osaka University Hospital                                           | Osaka, Japan | Sub-Investigator          |
| Masayuki       | Nakamori  | Osaka University Hospital                                           | Osaka, Japan | Sub-Investigator          |
| Makoto         | Kinoshita | Osaka University Hospital                                           | Osaka, Japan | Sub-Investigator          |
| Julian         | Gillmore  | National Amyloidosis Centre, Royal Free London NHS Foundation Trust | London, UK   | Primary Investigator      |
| Bella Ruth     | Mapalo    | National Amyloidosis Centre, Royal Free London NHS Foundation Trust | London, UK   | Primary Study Coordinator |
| Steven         | Law       | National Amyloidosis Centre, Royal Free London NHS Foundation Trust | London, UK   | Sub-Investigator          |
| Liza           | Chacko    | National Amyloidosis Centre, Royal Free London NHS Foundation Trust | London, UK   | Sub-Investigator          |
| Helen          | Lachmann  | National Amyloidosis Centre, Royal Free London NHS Foundation Trust | London, UK   | Sub-Investigator          |
| Oliver         | Cohen     | National Amyloidosis Centre, Royal Free London NHS Foundation Trust | London, UK   | Sub-Investigator          |
| Yousuf Siu Kay | Razvi     | National Amyloidosis Centre, Royal Free London NHS Foundation Trust | London, UK   | Sub-Investigator          |
| Sindhu         | Varughese | National Amyloidosis Centre, Royal Free London NHS Foundation Trust | London, UK   | Study Coordinator         |

|           |                      |                                                                     |                 |                                               |
|-----------|----------------------|---------------------------------------------------------------------|-----------------|-----------------------------------------------|
| Ana       | Martinez-Naharro     | National Amyloidosis Centre, Royal Free London NHS Foundation Trust | London, UK      | Sub-Investigator                              |
| Richard   | Orrell               | UCL Queen Square Institute of Neurology, University College London  | London, UK      | Sub-Investigator                              |
| Marianna  | Fontana              | National Amyloidosis Centre, Royal Free London NHS Foundation Trust | London, UK      | Sub-Investigator                              |
| Lisa      | Rannigan             | Royal Free Hospital                                                 | London, UK      | Study Coordinator                             |
| Sarah     | Louth                | National Amyloidosis Centre, Royal Free London NHS Foundation Trust | London, UK      | Study Coordinator                             |
| Eleni     | Zamba-Papanicolaou   | Cyprus Institute of Neurology and Genetics (CING)                   | Nicosia, Cyprus | Primary Investigator                          |
| Demetra   | Charalamnibous       | Cyprus Institute of Neurology and Genetics (CING)                   | Nicosia, Cyprus | Primary Study Coordinator                     |
| Rana      | Abu Manneh           | Cyprus Institute of Neurology and Genetics (CING)                   | Nicosia, Cyprus | Study Coordinator                             |
| Kleopas   | Kleopa               | Cyprus Institute of Neurology and Genetics (CING)                   | Nicosia, Cyprus | Sub-Investigator, Neurologist                 |
| Theodoros | Christodoulides      | Cardio Health Center                                                | Nicosia, Cyprus | Sub-Investigator, Cardiologist                |
| Savvas    | Frangos              | Bank of Cyprus Oncology Center                                      | Nicosia, Cyprus | Sub-Investigator, Nuclear Medicine Specialist |
| Michele   | Galganski-Cleanthous | Cyprus Institute of Neurology and Genetics (CING)                   | Nicosia, Cyprus | Neurophysiologist                             |
| Eftychia  | Gaglia               | Cyprus Institute of Neurology and Genetics (CING)                   | Nicosia, Cyprus | Nurse                                         |
| Irene     | Smoleski             | Cyprus Institute of Neurology and Genetics (CING)                   | Nicosia, Cyprus | Nurse                                         |
| Elena     | Kkolou               | Cyprus Institute of Neurology and Genetics (CING)                   | Nicosia, Cyprus | Pharmacist                                    |



|            |              |                                                                                                                            |                 |                           |
|------------|--------------|----------------------------------------------------------------------------------------------------------------------------|-----------------|---------------------------|
| Andry      | Ploutarchou  | Cyprus Institute of Neurology and Genetics (CING)                                                                          | Nicosia, Cyprus | Pharmacist                |
| Mariana    | Hanghiuc     | Cyprus Institute of Neurology and Genetics (CING)                                                                          | Nicosia, Cyprus | Nurse                     |
| Galini     | Chroidou     | Cyprus Institute of Neurology and Genetics (CING)                                                                          | Nicosia, Cyprus | Nurse                     |
| Olga       | Stylianou    | Cyprus Institute of Neurology and Genetics (CING)                                                                          | Nicosia, Cyprus | Nurse                     |
| Anastasia  | Krokou       | Cyprus Institute of Neurology and Genetics (CING)                                                                          | Nicosia, Cyprus | Physiotherapist           |
| Irene      | Zannetou     | Cyprus Institute of Neurology and Genetics (CING)                                                                          | Nicosia, Cyprus | Physiotherapist           |
| Efstathios | Kastritis    | Department of Clinical Therapeutics, National and Kapodistrian University of Athens, General Hospital of Athens, Alexandra | Athens, Greece  | Primary Investigator      |
| Dimitra    | Papadopoulou | Department of Clinical Therapeutics, National and Kapodistrian University of Athens, General Hospital of Athens, Alexandra | Athens, Greece  | Primary Study Coordinator |
| Ilias      | Spinasas     | Department of Clinical Therapeutics, National and Kapodistrian University of Athens, General Hospital of Athens, Alexandra | Athens, Greece  | Study Coordinator         |
| Panayiotis | Bakalis      | Department of Clinical Therapeutics, National and Kapodistrian University of                                               | Athens, Greece  | Study Coordinator         |

|           |                |                                                                                                                            |                        |                      |
|-----------|----------------|----------------------------------------------------------------------------------------------------------------------------|------------------------|----------------------|
|           |                | Athens, General Hospital of Athens, Alexandra                                                                              |                        |                      |
| Nikolaos  | Kanellias      | Department of Clinical Therapeutics, National and Kapodistrian University of Athens, General Hospital of Athens, Alexandra | Athens, Greece         | Sub-Investigator     |
| Despoina  | Fotiou         | Department of Clinical Therapeutics, National and Kapodistrian University of Athens, General Hospital of Athens, Alexandra | Athens, Greece         | Sub-Investigator     |
| Ioanna    | Dialoupi       | Department of Clinical Therapeutics, National and Kapodistrian University of Athens, General Hospital of Athens, Alexandra | Athens, Greece         | Sub-Investigator     |
| Magdalini | Migko          | Department of Clinical Therapeutics, National and Kapodistrian University of Athens, General Hospital of Athens, Alexandra | Athens, Greece         | Sub-Investigator     |
| Maria     | Gavriatopoulou | Department of Clinical Therapeutics, National and Kapodistrian University of Athens, General Hospital of Athens, Alexandra | Athens, Greece         | Sub-Investigator     |
| Soon-Chai | Low            | Division of Neurology, Department of                                                                                       | Kuala Lumpur, Malaysia | Primary Investigator |

|          |          |                                                                                                                                        |                             |                              |
|----------|----------|----------------------------------------------------------------------------------------------------------------------------------------|-----------------------------|------------------------------|
|          |          | Medicine,<br>University Malaya<br>Medical Centre                                                                                       |                             |                              |
| Mark     | Taylor   | Westmead Hospital                                                                                                                      | Westmead,<br>NSW, Australia | Primary Investigator         |
| Graeme   | Stewart  | Westmead Hospital                                                                                                                      | Westmead,<br>NSW, Australia | Primary Investigator         |
| Helen    | Knight   | Westmead Hospital                                                                                                                      | Westmead,<br>NSW, Australia | Primary Study<br>Coordinator |
| Steve    | Vucic    | Westmead Hospital                                                                                                                      | Westmead,<br>NSW, Australia | Sub-Investigator             |
| Antonia  | Carroll  | Westmead Hospital                                                                                                                      | Westmead,<br>NSW, Australia | Sub-Investigator             |
| Matthew  | Silby    | Westmead Hospital                                                                                                                      | Westmead,<br>NSW, Australia | Sub-Investigator             |
| Dan      | Suan     | Westmead Hospital                                                                                                                      | Westmead,<br>NSW, Australia | Sub-Investigator             |
| Simon    | Gibbs    | Eastern Health, Box<br>Hill Hospital                                                                                                   | Box Hill,<br>Australia      | Primary Investigator         |
| Carmela  | Corfield | Eastern Health, Box<br>Hill Hospital                                                                                                   | Box Hill,<br>Australia      | Primary Study<br>Coordinator |
| Suzana   | Jakicic  | Eastern Health, Box<br>Hill Hospital                                                                                                   | Box Hill,<br>Australia      | Study Coordinator            |
| Hayden   | Jina     | Eastern Health, Box<br>Hill Hospital                                                                                                   | Box Hill,<br>Australia      | Sub-Investigator             |
| Stephen  | Ting     | Eastern Health, Box<br>Hill Hospital                                                                                                   | Box Hill,<br>Australia      | Sub-Investigator             |
| Shi Qin  | Wong     | Eastern Health, Box<br>Hill Hospital                                                                                                   | Box Hill,<br>Australia      | Sub-Investigator             |
| Peter    | Mollee   | Princess Alexandra<br>Hospital                                                                                                         | Brisbane,<br>Australia      | Primary Investigator         |
| Lynda    | McKinley | Princess Alexandra<br>Hospital                                                                                                         | Brisbane,<br>Australia      | Primary Study<br>Coordinator |
| Emad     | Abro     | Princess Alexandra<br>Hospital                                                                                                         | Brisbane,<br>Australia      | Sub-Investigator             |
| Dariusz  | Korczyk  | Princess Alexandra<br>Hospital                                                                                                         | Brisbane,<br>Australia      | Sub-Investigator             |
| Gauthier | Remiche  | Centre de<br>Référence<br>Neuromusculaire,<br>Department of<br>Neurology,<br>Université Libre de<br>Bruxelles (ULB),<br>Hopital Erasme | Bruxelles,<br>Belgium       | Primary Investigator         |
| Nick     | Alaerts  | Centre de<br>Référence<br>Neuromusculaire,<br>Department of<br>Neurology,<br>Université Libre de                                       | Bruxelles,<br>Belgium       | Primary Study<br>Coordinator |

|          |            |                                                                                                                                        |                       |                              |
|----------|------------|----------------------------------------------------------------------------------------------------------------------------------------|-----------------------|------------------------------|
|          |            | Bruxelles (ULB),<br>Hopital Erasme                                                                                                     |                       |                              |
| Fabienne | De Veylder | Centre de<br>Référence<br>Neuromusculaire,<br>Department of<br>Neurology,<br>Université Libre de<br>Bruxelles (ULB),<br>Hopital Erasme | Bruxelles,<br>Belgium | Study Coordinator            |
| Kristl   | Claeys     | University Hospital<br>(UZ) Leuven                                                                                                     | Leuven,<br>Belgium    | Primary Investigator         |
| Elisa    | Debien     | University Hospital<br>(UZ) Leuven                                                                                                     | Leuven,<br>Belgium    | Primary Study<br>Coordinator |
| Joyce    | Cremers    | University Hospital<br>(UZ) Leuven                                                                                                     | Leuven,<br>Belgium    | Study Coordinator            |
| Ann      | D'hondt    | University Hospital<br>(UZ) Leuven                                                                                                     | Leuven,<br>Belgium    | Study Coordinator            |
| Bram     | De Wel     | University Hospital<br>(UZ) Leuven                                                                                                     | Leuven,<br>Belgium    | Sub-Investigator             |
